# Supplementary material
Source: PubMed Central journal article supplement (PMC6068019)
Supplement: 2018_199547-Disclosures_and_Contributions.pdf [file 2018_199547-Disclosures_and_Contributions.pdf]

Haematologica  
HAEMATOL/2018/199547  
Version 2

End-of-treatment and serial PET imaging has prognostic value and  
clinical utility in primary mediastinal B-cell lymphoma following  
dose-adjusted EPOCH-R - Response to Adams et al

Christopher Melani, Mark Roschewski, and Wyndham H. Wilson

Disclosures: All authors declare no competing financial interests.

Contributions: C. M. authored the first draft of the manuscript; W. H. W. and M. R. reviewed and edited the manuscript.
